# Supplementary material for: The core functions and forms paradigm throughout EPIS: designing and implementing an evidence-based practice with function fidelity
Source: Frontiers journal article supplement (doi:10.3389/frhs.2023.1281690), 2024-01-16
Supplement: Data_Sheet_3.pdf [file Data_Sheet_3.pdf]

### Appendix 3: Parenting Training Matrix Outlining the Functions, Forms, and Assessment Tools from Provider and Patient Perspectives

| Function                                                                                                                              | Form                                          | Provider Assessment                                                                                         | Patient Assessment                                                                                                                                                                                                                      |
|---------------------------------------------------------------------------------------------------------------------------------------|-----------------------------------------------|-------------------------------------------------------------------------------------------------------------|-----------------------------------------------------------------------------------------------------------------------------------------------------------------------------------------------------------------------------------------|
| To build positive rapport with both parent and child                                                                                  | Psychoeducation                               | STAR-C                                                                                                      | STAR-P                                                                                                                                                                                                                                  |
|                                                                                                                                       | Problem-Solving                               | All EMR Notes                                                                                               | Reported Use of Handout/Exercise:<br>Positive Self-Statements Brainstorm<br>Incentives for Me Brainstorm<br>Self-Talk in Problem Situations                                                                                             |
|                                                                                                                                       | Behavioral Practice Using Worksheets/Handouts | Periodic Reflections                                                                                        |                                                                                                                                                                                                                                         |
|                                                                                                                                       |                                               |                                                                                                             |                                                                                                                                                                                                                                         |
|                                                                                                                                       |                                               |                                                                                                             |                                                                                                                                                                                                                                         |
| To help strengthen parent-child bond/connection                                                                                       | Psychoeducation                               | STAR-C                                                                                                      | STAR-P                                                                                                                                                                                                                                  |
|                                                                                                                                       | Problem-Solving                               | EMR Notes Addressing:<br>Parental Attention<br>Persistence Coaching<br>Effective Praise<br>Tangible Rewards | PAPF<br>Reported Use of Handout/Exercise:<br>Special Time Record Sheet<br>Evaluating Special Time Interactions Checklist<br>Play and Special Time Brainstorm                                                                            |
|                                                                                                                                       | Set a SMART Goal                              |                                                                                                             |                                                                                                                                                                                                                                         |
|                                                                                                                                       | Roleplay                                      |                                                                                                             |                                                                                                                                                                                                                                         |
|                                                                                                                                       | Behavioral Practice Using Worksheets/Handouts |                                                                                                             |                                                                                                                                                                                                                                         |
|                                                                                                                                       |                                               | Periodic Reflections                                                                                        |                                                                                                                                                                                                                                         |
| To build parent capacity to serve as a social, emotional, and academic coach for child                                                | Psychoeducation                               | EMR Notes Addressing:<br>Persistence Coaching<br>Managing Your Own Emotions                                 | Reported Use of Handout/Exercise:<br>Praise Record Sheet<br>Emotional Literacy Checklist<br>Social Skills Coaching Checklist<br>Academic Coaching Checklist<br>Labeled Praise Refrigerator Notes<br>Positive Self-Statements Brainstorm |
|                                                                                                                                       | Problem-Solving                               |                                                                                                             |                                                                                                                                                                                                                                         |
|                                                                                                                                       | Set a SMART Goal                              |                                                                                                             |                                                                                                                                                                                                                                         |
|                                                                                                                                       | Roleplay                                      | Periodic Reflections                                                                                        |                                                                                                                                                                                                                                         |
|                                                                                                                                       | Behavioral Practice Using Worksheets/Handouts |                                                                                                             |                                                                                                                                                                                                                                         |
|                                                                                                                                       |                                               |                                                                                                             |                                                                                                                                                                                                                                         |
|                                                                                                                                       |                                               |                                                                                                             |                                                                                                                                                                                                                                         |
| To build parent confidence and skills in providing labeled praise to build child's social, emotional, and academic competency         | Psychoeducation                               | EMR Notes Addressing:<br>Effective Praise<br>Managing Your Own Emotions                                     | Reported Use of Handout/Exercise:<br>Praise Record Sheet<br>Behavior Record Sheet<br>Praise Brainstorm<br>Positive Self-Statements Brainstorm<br>Providing Praise Refrigerator Notes                                                    |
|                                                                                                                                       | Problem-Solving                               |                                                                                                             |                                                                                                                                                                                                                                         |
|                                                                                                                                       | Set a SMART Goal                              |                                                                                                             |                                                                                                                                                                                                                                         |
|                                                                                                                                       | Roleplay                                      | Periodic Reflections                                                                                        |                                                                                                                                                                                                                                         |
|                                                                                                                                       | Behavioral Practice Using Worksheets/Handouts |                                                                                                             |                                                                                                                                                                                                                                         |
|                                                                                                                                       |                                               |                                                                                                             |                                                                                                                                                                                                                                         |
| To build parent confidence and skills in providing incentives and rewards to build child's social, emotional, and academic competency | Psychoeducation                               | EMR Notes Addressing:<br>Tangible Rewards<br>Managing Your Own Emotions                                     | Reported Use of Handout/Exercise:<br>No-Cost/Spontaneous Tangible Rewards Brainstorm<br>Incentives for Me Brainstorm<br>Rewards Chart<br>Tangible Rewards Refrigerator Notes                                                            |
|                                                                                                                                       | Problem-Solving                               |                                                                                                             |                                                                                                                                                                                                                                         |
|                                                                                                                                       | Set a SMART Goal                              |                                                                                                             |                                                                                                                                                                                                                                         |
|                                                                                                                                       | Roleplay                                      | Periodic Reflections                                                                                        |                                                                                                                                                                                                                                         |
|                                                                                                                                       | Behavioral Practice Using Worksheets/Handouts |                                                                                                             |                                                                                                                                                                                                                                         |

|                                                                                 |                                               |                            |                                                                                                                                                                                                                                                                                                                                                                                                                                      |
|---------------------------------------------------------------------------------|-----------------------------------------------|----------------------------|--------------------------------------------------------------------------------------------------------------------------------------------------------------------------------------------------------------------------------------------------------------------------------------------------------------------------------------------------------------------------------------------------------------------------------------|
|                                                                                 |                                               |                            | Behavior Record Sheet                                                                                                                                                                                                                                                                                                                                                                                                                |
| To help parents establish household rules, routines, and responsibilities       | Psychoeducation                               | EMR Notes Addressing:      | Reported Use of Handout/Exercise:<br>Written morning routine for child<br>Written bedtime or after-school routine for child<br>Written household rules of family                                                                                                                                                                                                                                                                     |
|                                                                                 | Problem-Solving                               | Rules and Routines         |                                                                                                                                                                                                                                                                                                                                                                                                                                      |
|                                                                                 | Set a SMART Goal                              | Periodic Reflections       |                                                                                                                                                                                                                                                                                                                                                                                                                                      |
|                                                                                 | Roleplay                                      |                            |                                                                                                                                                                                                                                                                                                                                                                                                                                      |
|                                                                                 | Behavioral Practice Using Worksheets/Handouts |                            |                                                                                                                                                                                                                                                                                                                                                                                                                                      |
| To help parents set clear limits for their child in their home                  | Psychoeducation                               | EMR Notes Addressing:      | Reported Use of Handout/Exercise:<br>Limit Setting Brainstorm<br>Effective Commands Brainstorm<br>Limit Setting Refrigerator Notes<br>Commands Record Sheet                                                                                                                                                                                                                                                                          |
|                                                                                 | Problem-Solving                               | Clear Limit Setting        |                                                                                                                                                                                                                                                                                                                                                                                                                                      |
|                                                                                 | Set a SMART Goal                              | Managing Your Own Emotions |                                                                                                                                                                                                                                                                                                                                                                                                                                      |
|                                                                                 | Roleplay                                      | Periodic Reflections       |                                                                                                                                                                                                                                                                                                                                                                                                                                      |
|                                                                                 | Behavioral Practice Using Worksheets/Handouts |                            |                                                                                                                                                                                                                                                                                                                                                                                                                                      |
| To build parent capacity to handle misbehavior and use discipline appropriately | Psychoeducation                               | EMR Notes Addressing:      | Reported Use of Handout/Exercise:<br>Ignoring Misbehavior Brainstorm<br>Staying Calm While Ignoring Brainstorm<br>Selective Attention Brainstorm<br>Ignoring Misbehavior Refrigerator Notes<br>Behavior Record<br>Self-Talk in Problem Situations Handout<br>Ignore and Praise Record Sheet<br>Logical Consequences Refrigerator Notes<br>Special Time Record Sheet<br>Logical Consequences Record Sheet<br>Work Chores Record Sheet |
|                                                                                 | Problem-Solving                               | Logical Consequences       |                                                                                                                                                                                                                                                                                                                                                                                                                                      |
|                                                                                 | Set a SMART Goal                              | Periodic Reflections       |                                                                                                                                                                                                                                                                                                                                                                                                                                      |
|                                                                                 | Roleplay                                      |                            |                                                                                                                                                                                                                                                                                                                                                                                                                                      |
|                                                                                 | Cognitive-Emotional Regulation Training       |                            |                                                                                                                                                                                                                                                                                                                                                                                                                                      |
|                                                                                 | Behavioral Practice Using Worksheets/Handouts |                            |                                                                                                                                                                                                                                                                                                                                                                                                                                      |
|                                                                                 |                                               |                            |                                                                                                                                                                                                                                                                                                                                                                                                                                      |
|                                                                                 |                                               |                            |                                                                                                                                                                                                                                                                                                                                                                                                                                      |
|                                                                                 |                                               |                            |                                                                                                                                                                                                                                                                                                                                                                                                                                      |
|                                                                                 |                                               |                            |                                                                                                                                                                                                                                                                                                                                                                                                                                      |
|                                                                                 |                                               |                            |                                                                                                                                                                                                                                                                                                                                                                                                                                      |
|                                                                                 |                                               |                            |                                                                                                                                                                                                                                                                                                                                                                                                                                      |
| To build parent's capacity to problem solve difficulties with their child       | Psychoeducation                               | EMR Notes Addressing:      | Reported Use of Handout/Exercise:<br>SOLVE Practice Sheet                                                                                                                                                                                                                                                                                                                                                                            |
|                                                                                 | Problem-Solving                               | Problem Solving            |                                                                                                                                                                                                                                                                                                                                                                                                                                      |
|                                                                                 | Set a SMART Goal                              | Managing Your Own Emotions |                                                                                                                                                                                                                                                                                                                                                                                                                                      |
|                                                                                 | Roleplay                                      | Periodic Reflections       |                                                                                                                                                                                                                                                                                                                                                                                                                                      |
|                                                                                 | Behavioral Practice Using Worksheets/Handouts |                            |                                                                                                                                                                                                                                                                                                                                                                                                                                      |
| To build parent confidence and skills to manage child's emotions                | Psychoeducation                               | EMR Notes Addressing:      | Reported Use of Handout/Exercise:<br>Emotional Literacy Checklist                                                                                                                                                                                                                                                                                                                                                                    |
|                                                                                 | Problem-Solving                               | Persistence Coaching       |                                                                                                                                                                                                                                                                                                                                                                                                                                      |
|                                                                                 | Set a SMART Goal                              | Managing Your Own Emotions |                                                                                                                                                                                                                                                                                                                                                                                                                                      |
|                                                                                 | Roleplay                                      | Periodic Reflections       |                                                                                                                                                                                                                                                                                                                                                                                                                                      |

|                                                                    |                                               |                                                                                                                        |                                                                                                                   |
|--------------------------------------------------------------------|-----------------------------------------------|------------------------------------------------------------------------------------------------------------------------|-------------------------------------------------------------------------------------------------------------------|
|                                                                    | Behavioral Practice Using Worksheets/Handouts |                                                                                                                        |                                                                                                                   |
| To build parent confidence and skills to manage their own emotions | Psychoeducation                               | EMR Notes Addressing:<br>Managing Your Own Emotions                                                                    | Reported Use of Handout/Exercise:<br>Emotional Literacy Checklist                                                 |
|                                                                    | Problem-Solving                               |                                                                                                                        |                                                                                                                   |
|                                                                    | Set a SMART Goal                              | Periodic Reflections                                                                                                   |                                                                                                                   |
|                                                                    | Roleplay                                      |                                                                                                                        |                                                                                                                   |
| To improve parent communication skills                             | Psychoeducation                               | EMR Notes Addressing:<br>Persistence Coaching<br>Effective Praise<br>Clear Limit Setting<br>Managing Your Own Emotions | Reported Use of Handout/Exercise:<br>Emotional Literacy Checklist<br>Social Skills Checklist<br>Praise Brainstorm |
|                                                                    | Problem-Solving                               |                                                                                                                        |                                                                                                                   |
|                                                                    | Set a SMART Goal                              |                                                                                                                        |                                                                                                                   |
|                                                                    | Roleplay                                      |                                                                                                                        |                                                                                                                   |
|                                                                    | Behavioral Practice Using Worksheets/Handouts |                                                                                                                        | Positive Self-Statements Brainstorm                                                                               |
|                                                                    |                                               | Periodic Reflections                                                                                                   |                                                                                                                   |

SMART Goal: Specific, Measurable, Achievable, Relevant, and Time-Bound Goal

STAR-C: Scale to Assess Therapeutic Relationship - Clinician

STAR-P: Scale to Assess Therapeutic Relationship - Patient

EMR: Electronic Medical Record

PAPF: Parents' Assessment of Protective Factors
